# Supplementary material for: Unravelling the different pathways of cyclohexene oxidation via a peroxyl radical generated from tert-butyl hydroperoxide (TBHP) by various metal salts
Source: Royal Society of Chemistry journal article supplement (doi:10.1039/d4qo01681e), 2024-10-18
Supplement: d4qo01681e1.pdf [file d4qo01681e1.pdf]

# Supporting Information

## Understanding the different oxidative pathways of cyclohexene through modulating reactive oxygen species generated from *tert*-butyl hydroperoxide (TBHP) by various metal salts

Lu-Jian Zhou<sup>a</sup>, Xiao-Hui Liu<sup>a\*</sup>, Han-Wen Zhang<sup>a</sup>, Can Xue<sup>a</sup>, Han-Kang Zhong<sup>a</sup>, Xian-Tai Zhou<sup>a,b\*</sup>

<sup>a</sup> School of Chemical Engineering and Technology, Sun Yat-sen University, Zhuhai 519082, China

<sup>b</sup> Huizhou Research Institute, Sun Yat-sen University, Huizhou 516081, P.R. China

### 1. Experiment section

#### 1.1 General Considerations

Solvents were dried according to the literature procedures and redistilled under an argon atmosphere before use. All air- and moisture-sensitive operations were carried out using standard high vacuum line, Schlenk techniques or in an inert atmosphere glovebox containing an atmosphere of nitrogen.

#### 1.2 Materials

All reagents were purchased from Energy Chemical and Aldrich. Isotopic oxygen (<sup>18</sup>O<sub>2</sub>) was purchased from Taiyo Nippon Sanso. The cyclohexene-D<sub>10</sub> were purchased from C/D/N ISOTopes.

#### 1.3 Instrumentations

GC analyses were performed on a Shimadzu GC-2010 plus equipped with the capillary column (Rtx-5, 30 m × 0.32 mm × 0.25 μm) and the FID detector. The products were identified by comparison of their GC retention times with commercial samples. The CSI-MS spectrometer were obtained on Bruker's timsTOF, and the cold jet is Bruker's CryoSpray. Mass spectra were obtained on a Shimadzu GCMS-2010A. The EPR (Electron Paramagnetic Resonance) spectroscopy measurements were performed on a JESFA-200 (JEOL, Japan) spectrometer using PBN/DMPO as a free-radical spin-trapping agent. EPR analyses were performed at a microwave frequency of 9.20-9.45 GHz at 298K. Instrument conditions for all analyses were as follows: microwave frequency, 9.20-9.45 GHz; modulation amplitude, 0.1 mT; modulation frequency, 100 kHz; power, 2.0 mW; and time constant, 0.03 s.

#### 1.4 Catalytic oxidation of cyclohexene

A 25 mL Schlenck tube was charged with cyclohexene (1.6 mmol), catalyst (4% mol), TBHP (5 equiv.

to substrate), solvent (acetonitrile, 5 mL) through the reaction solution for 4 h at 30 °C. The formation of products was monitored by GC (Shimadzu GC-2010 plus) or GC-MS (Shimadzu GCMS-QP2010).

### *1.5 Free radical capture experiments*

The reaction solution and DMPO or PBN (free-radical spin-trapping agent: DMPO, 5,5-Dimethyl-1-pyrroline N-Oxide; PBN, N-tert-butyl-2-phenylnitron) are mixed and added to the Wilmad WG-810-A quartz-flat cell. The cell was sealed after filling with the different experimental atmospheres required. EPR analyses were performed under a microwave frequency of 9.26 GHz at 298 K.

## 2. Results

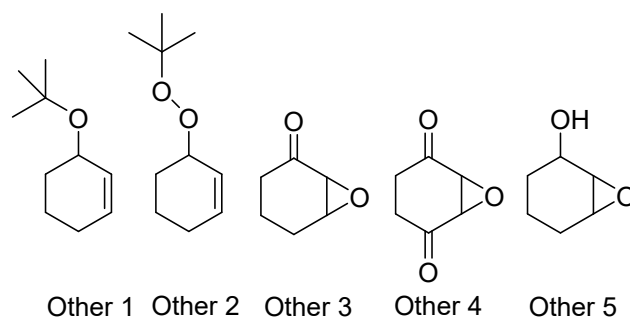

Fig. S1. Other products of cyclohexene oxidation

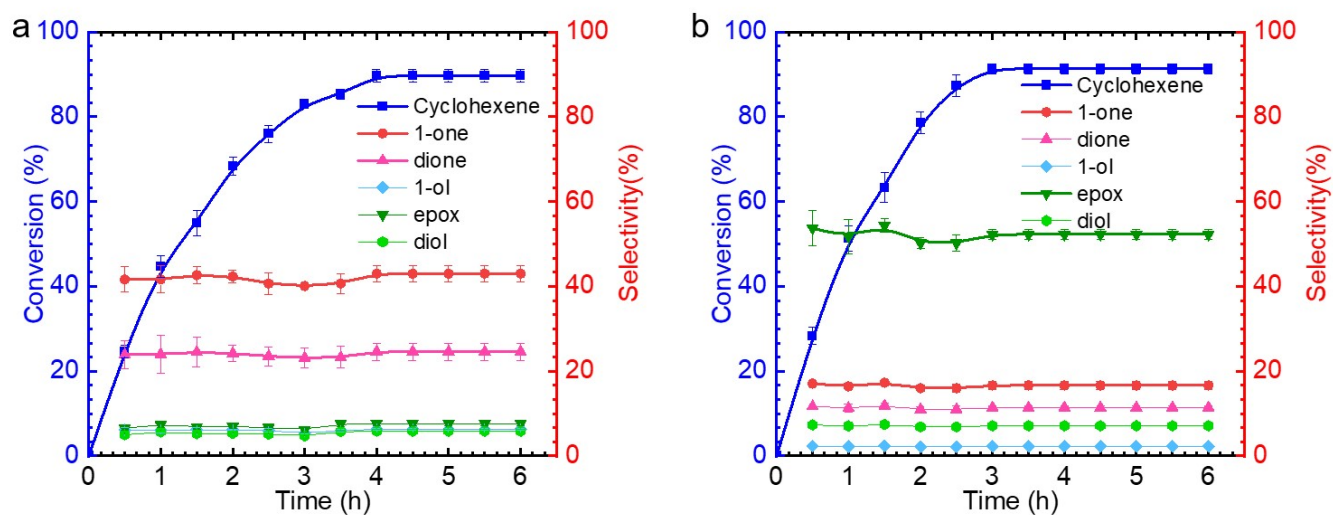

Fig. S2. Time-dependent conversion and product distribution for cyclohexene oxidation in  $\text{CuCl}_2$ (a) and  $\text{VCl}_3$ (b) system (cyclohexene 1.6 mmol, TBHP 5.0 equiv, 30.0 °C, 4 mol % catalyst, solvent acetonitrile 5 mL).

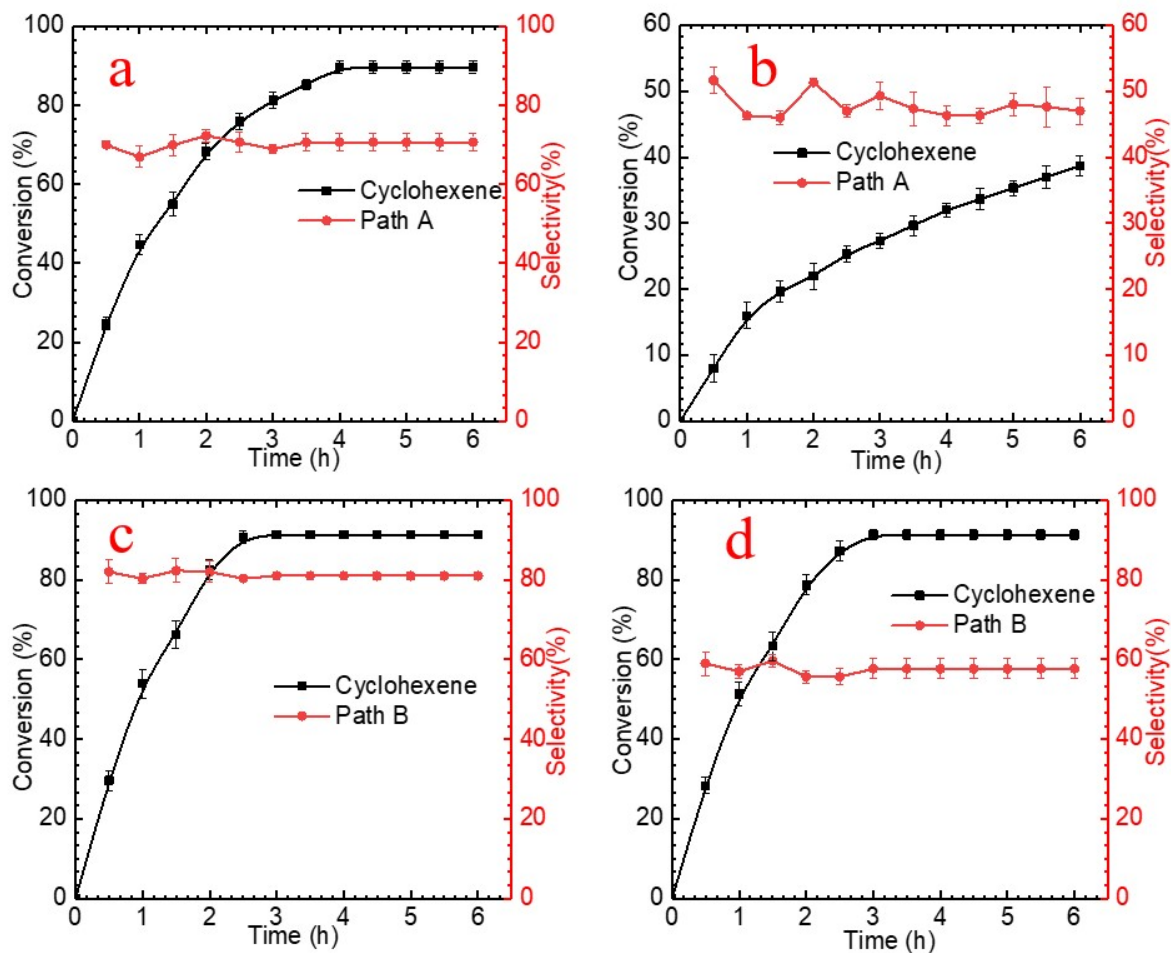

Fig. S3. (a) Effect of reaction time on cyclohexene-H10 epoxidation in the  $\text{CuCl}_2$  system. (b) Effect of reaction time on cyclohexene-D10 epoxidation in the  $\text{CuCl}_2$  system. (c) Effect of reaction time on cyclohexene-H10 epoxidation in the  $\text{VCl}_3$  system. (d) Effect of reaction time on cyclohexene-D10 epoxidation in the  $\text{VCl}_3$  system.

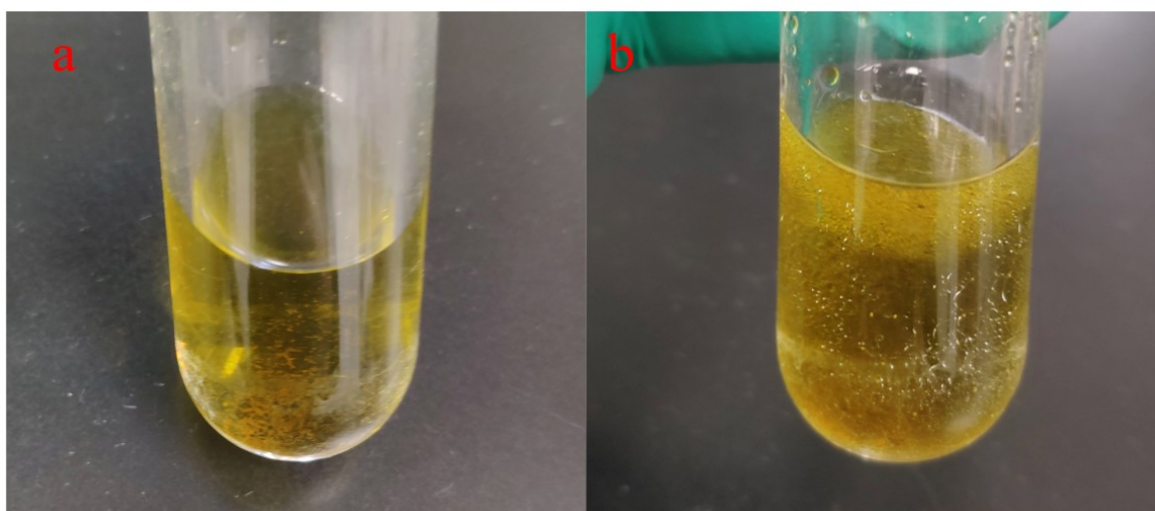

Fig. S4.  $\text{CuCl}_2$  catalyzed TBHP before (a) and during reaction pictures (b).

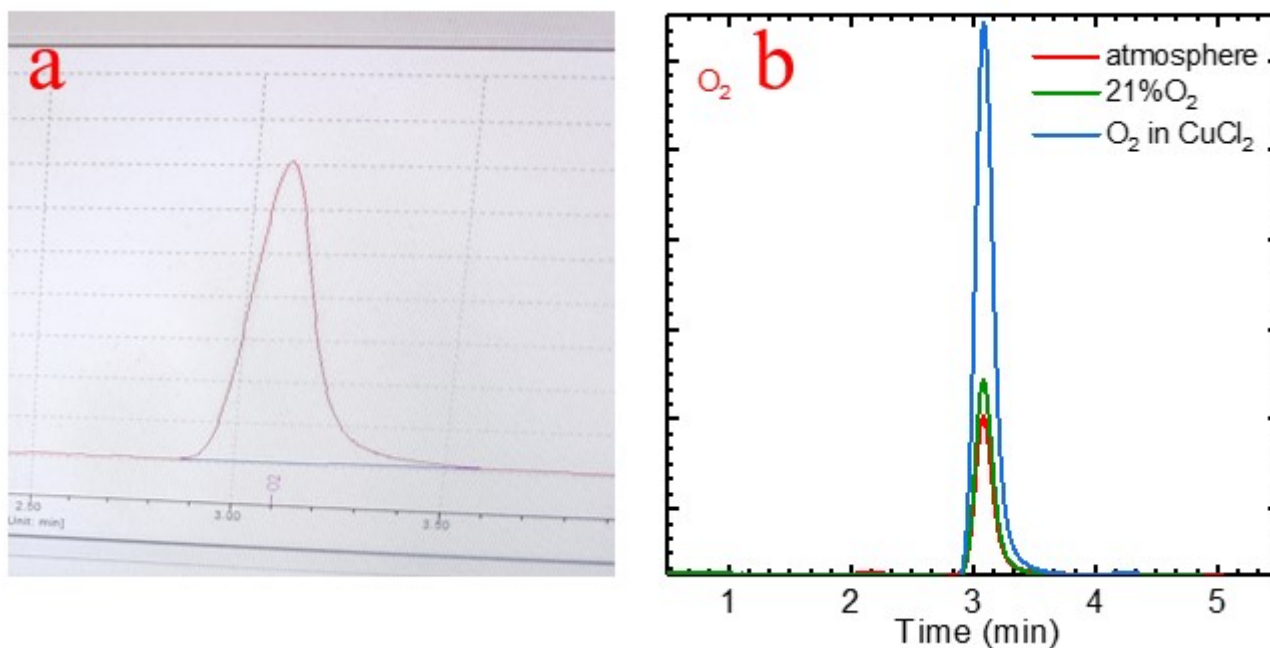

Fig. S5.(a) Gas species produced in CuCl<sub>2</sub> systems. (b) O<sub>2</sub> intensity in CuCl<sub>2</sub> systems

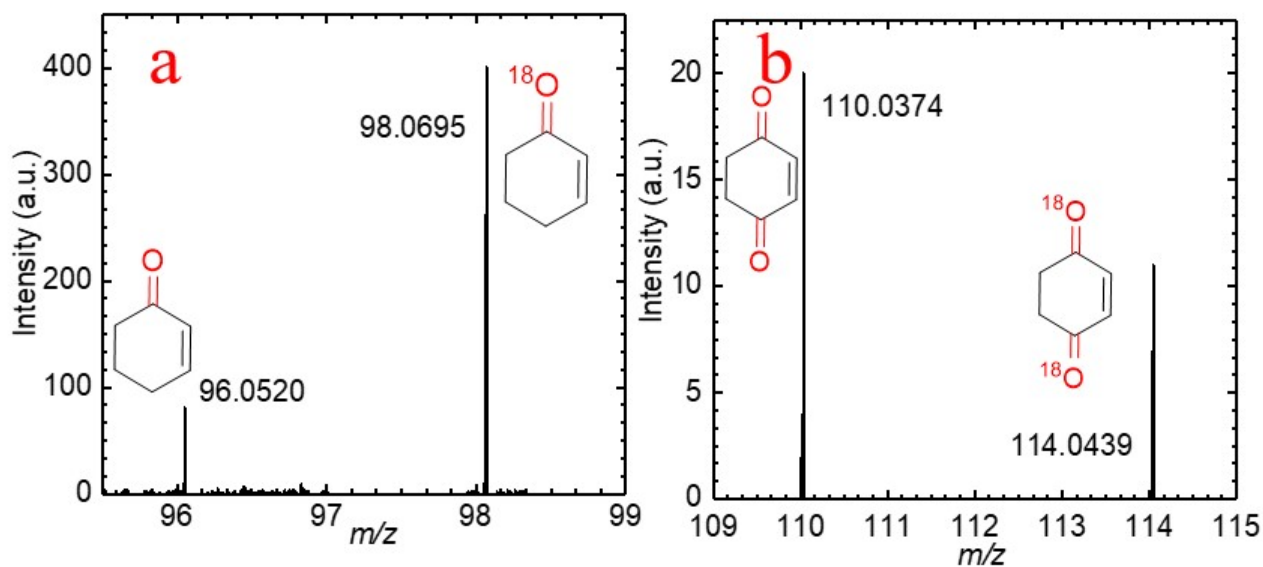

Fig. S6. CSI-MS spectra of <sup>18</sup>O<sub>2</sub> (a) oxygen-labeled cyclohexanone.[C<sub>6</sub>H<sub>8</sub><sup>18</sup>O]:  $m/z = 98.0695(\text{exp.}), m/z = 98.0695(\text{cal.})$ ; (b) oxygen-labeled 1,4-cyclohexen-2-one.[C<sub>6</sub>H<sub>6</sub><sup>18</sup>O<sub>2</sub>]:  $m/z = 114.0439(\text{exp.}), m/z = 114.0453(\text{cal.})$ .

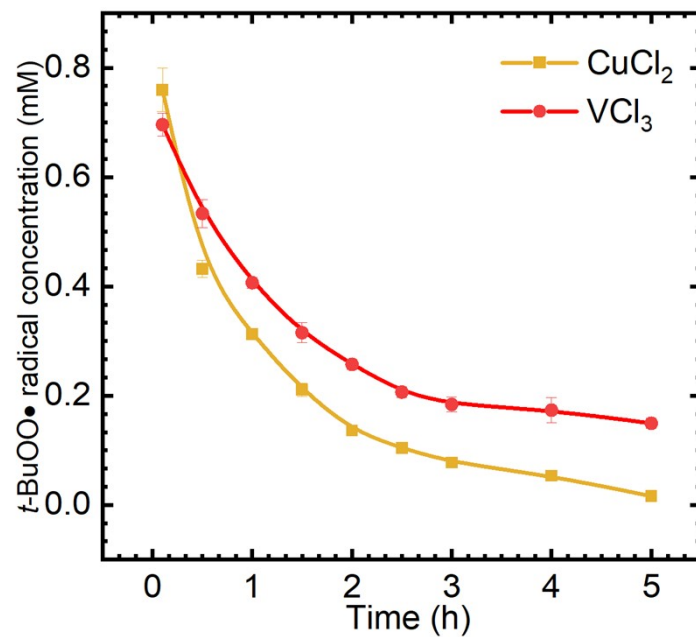

Fig. S7. The consumption of *t*-BuOO• radicals in  $\text{CuCl}_2$  and  $\text{VCl}_3$  system

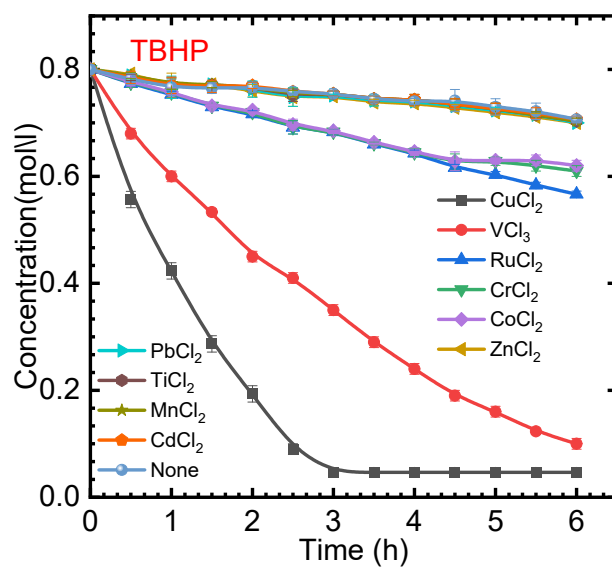

Fig. S8. TBHP consumption rate curves catalyzed by various catalysts

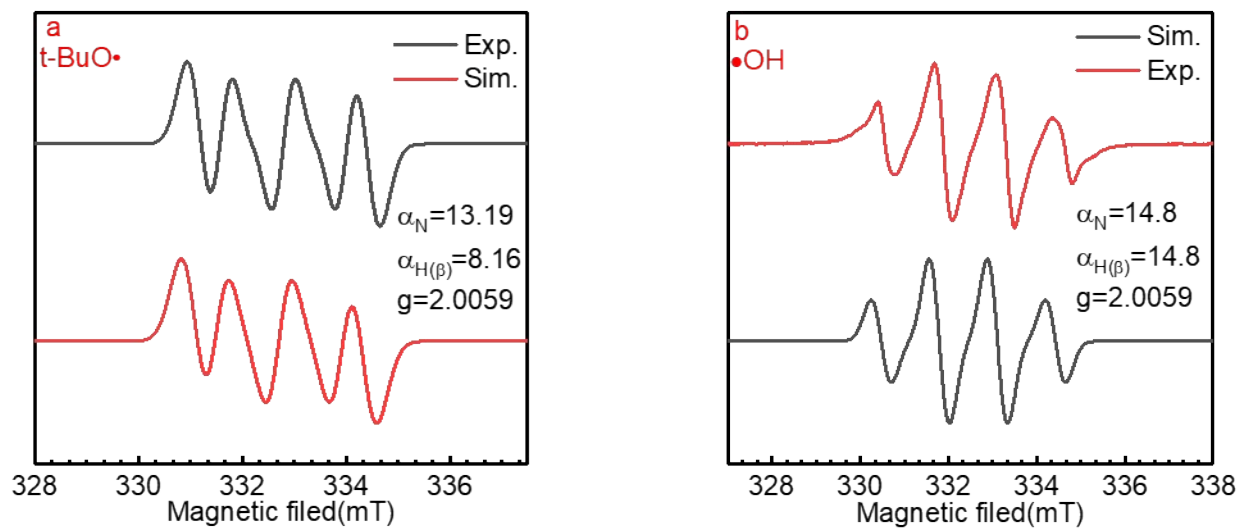

Fig. S9. Experimental (black) and simulated (red) X-band EPR spectra of  $t\text{-BuO}\cdot$  (a) and  $\cdot\text{OH}$  in the oxidation of cyclohexene (DMPO as a free-radical spin trapping agent).

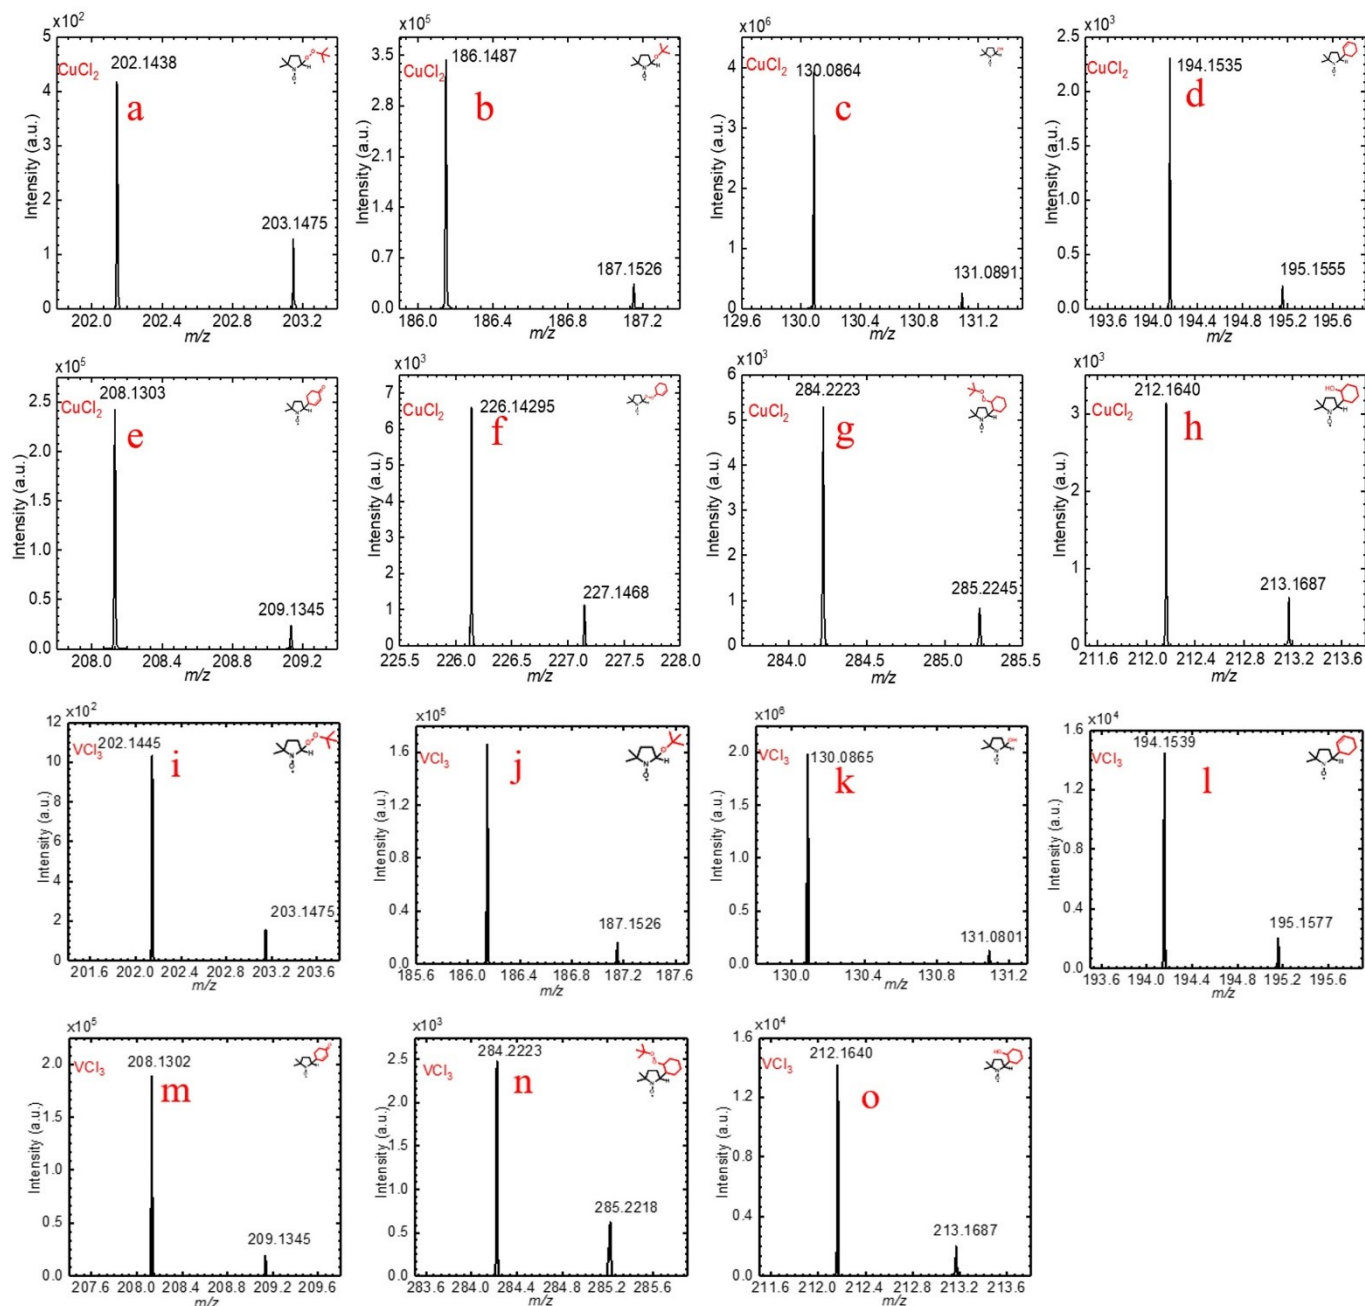

Fig. S10. CSI-MS spectra of DMPO spin adducts of (a)  $\bullet\text{O}_2\text{C}_4\text{H}_9$  radical.  $m/z = 202.1438(\text{exp.}), m/z = 202.1443(\text{cal.})$ , (b)  $\bullet\text{OC}_4\text{H}_9$  radical.  $m/z = 186.1487(\text{exp.}), m/z = 186.1494(\text{cal.})$ , (c)  $\bullet\text{OH}$  radical.  $m/z = 130.0864(\text{exp.}), m/z = 130.0868(\text{cal.})$ , (d)  $\bullet\text{C}_6\text{H}_9$  radical.  $m/z = 194.1535(\text{exp.}), m/z = 194.1545(\text{cal.})$ , (e)  $\bullet\text{OC}_6\text{H}_7$  radical.  $m/z = 208.1303(\text{exp.}), m/z = 208.1338(\text{cal.})$ , (f)  $\bullet\text{O}_2\text{C}_6\text{H}_9$  radical.  $m/z = 226.1430(\text{exp.}), m/z = 226.1443(\text{cal.})$ , (g)  $\bullet\text{O}_2\text{C}_{10}\text{H}_{19}$  radical.  $m/z = 284.2223(\text{exp.}), m/z = 284.2226(\text{cal.})$ , (h)  $\bullet\text{OC}_6\text{H}_{12}$  radical.  $m/z = 212.1640(\text{exp.}), m/z = 212.1651(\text{cal.})$  in  $\text{CuCl}_2$  catalytic system.

And (i)  $\bullet\text{O}_2\text{C}_4\text{H}_9$  radical.  $m/z = 202.1445(\text{exp.}), m/z = 202.1443(\text{cal.})$ , (j)  $\bullet\text{OC}_4\text{H}_9$  radical.  $m/z = 186.1489(\text{exp.}), m/z = 186.1494(\text{cal.})$ , (k)  $\bullet\text{OH}$  radical.  $m/z = 130.0865(\text{exp.}), m/z = 130.0868(\text{cal.})$ , (l)  $\bullet\text{C}_6\text{H}_9$  radical.  $m/z = 194.1539(\text{exp.}), m/z = 194.1545(\text{cal.})$ , (m)  $\bullet\text{OC}_6\text{H}_7$  radical.  $m/z = 208.1302(\text{exp.}), m/z = 208.1338(\text{cal.})$ , (n)  $\bullet\text{O}_2\text{C}_{10}\text{H}_{19}$  radical.  $m/z = 284.2223(\text{exp.}), m/z = 284.2226(\text{cal.})$ , (o)  $\bullet\text{OC}_6\text{H}_{12}$  radical.  $m/z = 228.1600(\text{exp.}), m/z = 228.1600(\text{cal.})$  in  $\text{VCl}_3$  catalytic system.



Table S1. Catalytic performance of metal salts for cyclohexene selective oxidation <sup>a</sup>

| Entry | Catalyst          | Conv. (%) | Select. of products (%) |        |        |
|-------|-------------------|-----------|-------------------------|--------|--------|
|       |                   |           | Path A                  | Path B | Others |
| 1     | None              | 9         | 33                      | 48     | 19     |
| 2     | CuCl <sub>2</sub> | 93        | 73                      | 13     | 14     |
| 3     | VCl <sub>3</sub>  | 90        | 30                      | 58     | 12     |
| 4     | RuCl <sub>2</sub> | 30        | 32                      | 47     | 21     |
| 5     | CrCl <sub>2</sub> | 29        | 36                      | 42     | 22     |
| 6     | CoCl <sub>2</sub> | 25        | 28                      | 48     | 24     |
| 7     | PbCl <sub>2</sub> | 10        | 32                      | 57     | 11     |
| 8     | TiCl <sub>3</sub> | 12        | 32                      | 43     | 25     |

<sup>a</sup>Cyclohexene 1.6 mmol, TBHP 5.0 equiv, 30.0 °C, 4.0 h, 4 mol % catalyst, MeCN as solvent (5 mL).

Table S2. Effect of catalyst on cyclohexene oxidation <sup>a</sup>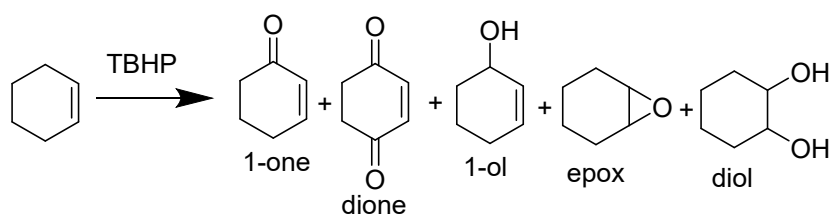

| Entry | Catalyst          | Conv. (%) | Select. (%) |       |      |      |      |        |
|-------|-------------------|-----------|-------------|-------|------|------|------|--------|
|       |                   |           | 1-one       | dione | 1-ol | epox | diol | Others |
| 1     | None              | 9         | 19          | 8     | 6    | 5    | 43   | 19     |
| 2     | VCl <sub>3</sub>  | 90        | 16          | 11    | 3    | 51   | 7    | 12     |
| 2     | CuCl <sub>2</sub> | 93        | 43          | 24    | 6    | 7    | 6    | 14     |
| 3     | RuCl <sub>2</sub> | 30        | 20          | 9     | 3    | 7    | 40   | 21     |
| 4     | CrCl <sub>2</sub> | 29        | 22          | 8     | 6    | 5    | 37   | 22     |
| 5     | CoCl <sub>2</sub> | 25        | 15          | 7     | 6    | 5    | 43   | 24     |
| 6     | ZnCl <sub>2</sub> | 7         | 21          | 8     | 4    | 6    | 45   | 16     |
| 7     | PbCl <sub>2</sub> | 10        | 18          | 10    | 4    | 6    | 51   | 11     |
| 8     | TiCl <sub>3</sub> | 12        | 15          | 12    | 5    | 4    | 39   | 25     |
| 9     | MnCl <sub>2</sub> | 8         | 17          | 10    | 5    | 7    | 38   | 23     |
| 11    | CdCl <sub>2</sub> | 8         | 18          | 9     | 4    | 6    | 50   | 13     |

<sup>a</sup>Cyclohexene 1.6 mmol, TBHP 5.0 equiv, 30.0 °C, 4.0 h, 4 mol % catalyst, MeCN as solvent (5 mL).

Table S3. Effect of solvent type on cyclohexene oxidation <sup>a</sup>

| Entry | Catalyst          | Solvent | Conversion (%) | selectivity (%) |       |      |      |      |        |
|-------|-------------------|---------|----------------|-----------------|-------|------|------|------|--------|
|       |                   |         |                | 1-one           | dione | 1-ol | epox | diol | Others |
| 1     | CuCl <sub>2</sub> | DCM     | 40             | 39              | 11    | 5    | 11   | 8    | 19     |
| 2     | CuCl <sub>2</sub> | DCE     | 53             | 40              | 22    | 6    | 7    | 6    | 59     |
| 3     | CuCl <sub>2</sub> | EA      | 95             | 18              | 10    | 5    | 4    | 4    | 7      |
| 4     | CuCl <sub>2</sub> | THF     | 10             | 51              | 24    | 3    | 7    | 8    | 14     |
| 5     | CuCl <sub>2</sub> | ACN     | 93             | 43              | 24    | 6    | 7    | 6    | 19     |
| 6     | VCl <sub>3</sub>  | DCM     | 25             | 15              | 7     | 6    | 5    | 43   | 24     |
| 7     | VCl <sub>3</sub>  | DCE     | 30             | 21              | 8     | 4    | 6    | 45   | 16     |
| 8     | VCl <sub>3</sub>  | EA      | 92             | 18              | 10    | 4    | 6    | 51   | 11     |
| 9     | VCl <sub>3</sub>  | THF     | 8              | 15              | 12    | 5    | 4    | 39   | 25     |
| 10    | VCl <sub>3</sub>  | ACN     | 90             | 16              | 11    | 3    | 51   | 7    | 12     |

<sup>a</sup> Cyclohexene 1.6 mmol, TBHP 5.0 equiv, 30.0 °C, 4.0 h, 4 mol % catalyst, solvent (5 mL).

Table S4. Effect of temperature type on cyclohexene oxidation <sup>a</sup>

| Entry | Catalyst          | T (°C) | Conv. (%) | Select. (%) |       |      |      |      |        |
|-------|-------------------|--------|-----------|-------------|-------|------|------|------|--------|
|       |                   |        |           | 1-one       | dione | 1-ol | epox | diol | Others |
| 1     | CuCl <sub>2</sub> | 30     | 93        | 43          | 24    | 6    | 7    | 6    | 19     |
| 2     | CuCl <sub>2</sub> | 40     | 92        | 40          | 21    | 5    | 9    | 5    | 14     |
| 3     | CuCl <sub>2</sub> | 50     | 94        | 38          | 19    | 6    | 7    | 6    | 20     |
| 4     | CuCl <sub>2</sub> | 60     | 93        | 38          | 19    | 5    | 4    | 5    | 24     |
| 6     | VCl <sub>3</sub>  | 30     | 90        | 16          | 11    | 3    | 51   | 7    | 12     |
| 7     | VCl <sub>3</sub>  | 40     | 91        | 17          | 10    | 4    | 50   | 8    | 11     |
| 8     | VCl <sub>3</sub>  | 50     | 92        | 18          | 13    | 2    | 49   | 6    | 12     |
| 10    | VCl <sub>3</sub>  | 60     | 90        | 16          | 14    | 3    | 47   | 7    | 13     |

<sup>a</sup> Cyclohexene 1.6 mmol, TBHP 5.0 equiv, 4.0 h, 4 mol % catalyst, MeCN as solvent (5 mL).

Table S5. Oxidation of *cis*-stilbene by VCl<sub>3</sub> and CuCl<sub>2</sub><sup>a</sup>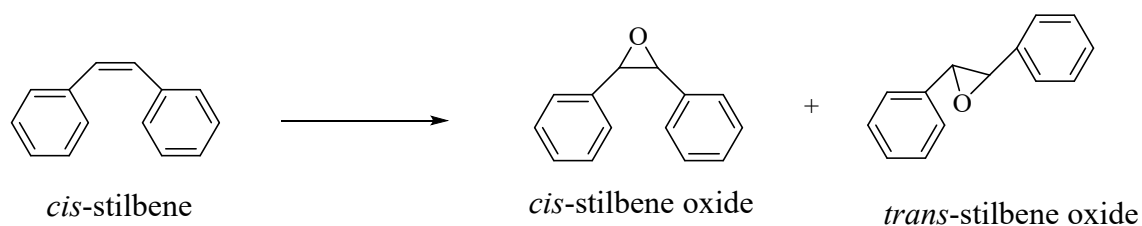

| Entry | Catalysts         | Conv./% | Products/mmol              |                              | Ratio of <i>cis</i> -<br>/ <i>trans</i> -oxide |
|-------|-------------------|---------|----------------------------|------------------------------|------------------------------------------------|
|       |                   |         | <i>cis</i> -stilbene oxide | <i>trans</i> -stilbene oxide |                                                |
| 1     | -                 | 12      | 0.182                      | 0.009                        | 95/5                                           |
| 2     | VCl <sub>3</sub>  | 70      | 0.123                      | 0.997                        | 11/89                                          |
| 3     | CuCl <sub>2</sub> | 23      | 0.096                      | 0.272                        | 26/74                                          |

<sup>a</sup> *cis*-stilbene 1.6 mmol, TBHP 5.0 equiv, MeCN (5 mL), 4.0 h, 4 mol % catalyst.

Table S6. Control experiments with various oxidants<sup>a</sup>

| Entry | Substrate | Oxidant                       | Conversion<br>(%) | Selectivity (%) |       |      |      |      |        |
|-------|-----------|-------------------------------|-------------------|-----------------|-------|------|------|------|--------|
|       |           |                               |                   | 1-one           | dione | 1-ol | epox | diol | Others |
| 1     |           | TBHP                          | 0                 | -               | -     | -    | -    | -    | -      |
| 2     |           | DTBP                          | 0                 | -               | -     | -    | -    | -    | -      |
| 3     |           | H <sub>2</sub> O <sub>2</sub> | 0                 | -               | -     | -    | -    | -    | -      |
| 4     |           | TBHP                          | 93                | 43              | 24    | 6    | 7    | 6    | 14     |
| 5     |           | DTBP                          | 10                | -               | -     | -    | -    | -    | 100    |
| 6     |           | H <sub>2</sub> O <sub>2</sub> | 35                | 38              | 25    | 13   | --   | 14   | 10     |
| 7     |           | TBHP                          | 100               | 67              | 10    | -    | -    | -    | 23     |
| 8     |           | DTBP                          | 0                 | -               | -     | -    | -    | -    | -      |
| 9     |           | H <sub>2</sub> O <sub>2</sub> | 68                | 52              | 11    | -    | -    | -    | 37     |
| 10    |           | TBHP                          | 10                | -               | 60    | -    | -    | -    | 40     |
| 11    |           | DTBP                          | 0                 | -               | -     | -    | -    | -    | -      |
| 12    |           | H <sub>2</sub> O <sub>2</sub> | 8                 | -               | 76    | -    | -    | -    | 24     |

<sup>a</sup> Substrate: 1.6 mmol, oxidant 5.0 equiv, 30.0 °C, 4.0 h, 0.1 MPa, 4 mol % CuCl<sub>2</sub>, MeCN (5 mL).
